# Supplementary material for: On the hunt for truly biocompatible ionic liquids for lipase-catalyzed reactions
Source: Royal Society of Chemistry journal article supplement (doi:10.1039/c4ra15021j), 2014-12-11
Supplement: c4ra15021j1.pdf [file c4ra15021j1.pdf]

## On the hunt for truly biocompatible ionic liquids for lipase-catalyzed reactions

F.J. Deive, D. Ruivo, J.V. Rodrigues, C.M. Gomes, M.A. Sanromán, L.P.N. Rebelo, J.M.S.S Esperança\* and A. Rodríguez\*

### Electronic Supplementary Information

#### Reagents used

The substrate for lipolytic activity determination, *p*-nitrophenyl laurate, the compounds for buffer preparation in lipolytic activity assay, CaCl<sub>2</sub>·2H<sub>2</sub>O and Trizma base, Cholinium chloride (> 98%), the fluorescence probe Sypro Orange and amino acids L-Alanine (>99.5%), L-Glycine (>99%) and L-Lysine (98%) were purchased from Sigma Aldrich. The cholinium-based ionic liquids used in this work were synthesized on the basis of the route proposed by Tao et al (2013),<sup>S1</sup> and optimized as follows: ChOH aqueous solution was obtained after passing ChCl through an Amberlite IRN-78 anion exchange resin packed column. ChOH was then neutralized with an equimolar aqueous solution of amino acid by stirring at room temperature for 12 h. After neutralization, water was evaporated under vacuum at 323.15 K. The excess of amino acid was precipitated by adding methanol. The structures of ChAA ILs were confirmed by <sup>1</sup>H NMR, <sup>13</sup>C NMR and FT-IR spectra, and the main data are shown below. The purity of the synthesized ionic liquids was always higher than 95%, as checked by NMR spectra. Coulometric Karl-Fischer titrations yielded final water contents below 1500 ppm. The concentration of Cl<sup>-</sup> in each ChAA was measured with a chloride specific ion electrode, and the related impurity was lower than 0.05 wt %. The pure ionic liquids were stored in amber glass vials with screw caps provided with a septum to ensure a secure seal and to prevent humidity. *Thermomyces lanuginosus* lipase was also purchased from Sigma Aldrich and kept at 4 °C until use.

#### a) Data for ChGly

<sup>1</sup>H NMR δ/ppm (400 MHz, D<sub>2</sub>O): 3.18 (9H, s, (CH<sub>3</sub>)<sub>3</sub>N), 3.19 (2H, s, CH<sub>2</sub>NH<sub>2</sub>), 3.50 (2H, m, CH<sub>2</sub>OH), 4.03 (2H, m, CH<sub>2</sub>CH<sub>2</sub>N).

<sup>13</sup>C NMR δ/ppm (100 MHz, D<sub>2</sub>O): 44.75 (CH<sub>2</sub>NH<sub>2</sub>), 3 x 54.2 ((CH<sub>3</sub>)<sub>3</sub>N), 55.93 (CH<sub>2</sub>OH), 67.78 (CH<sub>2</sub>CH<sub>2</sub>N), 180.94 (C=O).

IR: ν = 3347, 2943, 1568, 1479, 1398, 1085, 954 cm<sup>-1</sup>.

Tg: -80.44 °C

#### b) Data for ChAla

<sup>1</sup>H NMR δ/ppm (400 MHz, D<sub>2</sub>O): 1.22 (3H, d, CH<sub>3</sub>CH), 3.20 (9H, s, (CH<sub>3</sub>)<sub>3</sub>N), 3.35 (1H, q, CHNH<sub>2</sub>), 3.52 (2H, m, CH<sub>2</sub>OH), 4.05 (2H, m, CH<sub>2</sub>CH<sub>2</sub>N).

<sup>13</sup>C NMR δ/ppm (100 MHz, D<sub>2</sub>O): 19.95 (CH<sub>3</sub>), 51.31 (CHNH<sub>2</sub>), 3 x 53.8 ((CH<sub>3</sub>)<sub>3</sub>N), 55.54 (CH<sub>2</sub>OH), 67.39 (CH<sub>2</sub>CH<sub>2</sub>N), 183.63 (C=O).

IR: ν = 3356, 2255, 1563, 1478, 1406, 1362, 1135, 1083, 954, 856 cm<sup>-1</sup>

Tg: -76.48 °C

#### c) Data for ChLys

<sup>1</sup>H NMR δ/ppm (400 MHz, D<sub>2</sub>O): 1.36 (2H, m, CH<sub>2</sub>), 1.56 (2H, m, CH<sub>2</sub>), 2.79 (2H, t, CH<sub>2</sub>NH<sub>2</sub>), 3.20 (9H, s, (CH<sub>3</sub>)<sub>3</sub>N), 3.26 (1H, t, CHNH<sub>2</sub>), 3.52 (2H, m, CH<sub>2</sub>OH), 4.06 (2H, m, CH<sub>2</sub>CH<sub>2</sub>N).

<sup>13</sup>C NMR δ/ppm (100 MHz, D<sub>2</sub>O): 22.02 (CH<sub>2</sub>), 28.38 (CH<sub>2</sub>), 33.78 (CH<sub>2</sub>CHNH<sub>2</sub>), 39.61 (CH<sub>2</sub>NH<sub>2</sub>), 3 x 53.8 ((CH<sub>3</sub>)<sub>3</sub>N), 55.55 (CHNH<sub>2</sub>), 57.5 (CH<sub>2</sub>OH), 67.36 (CH<sub>2</sub>CH<sub>2</sub>N), 182.77 (C=O).

IR: ν = 2923, 2852, 1569, 1480, 1386, 1089, 954, 865 cm<sup>-1</sup>.

Tg: -64.55 °C

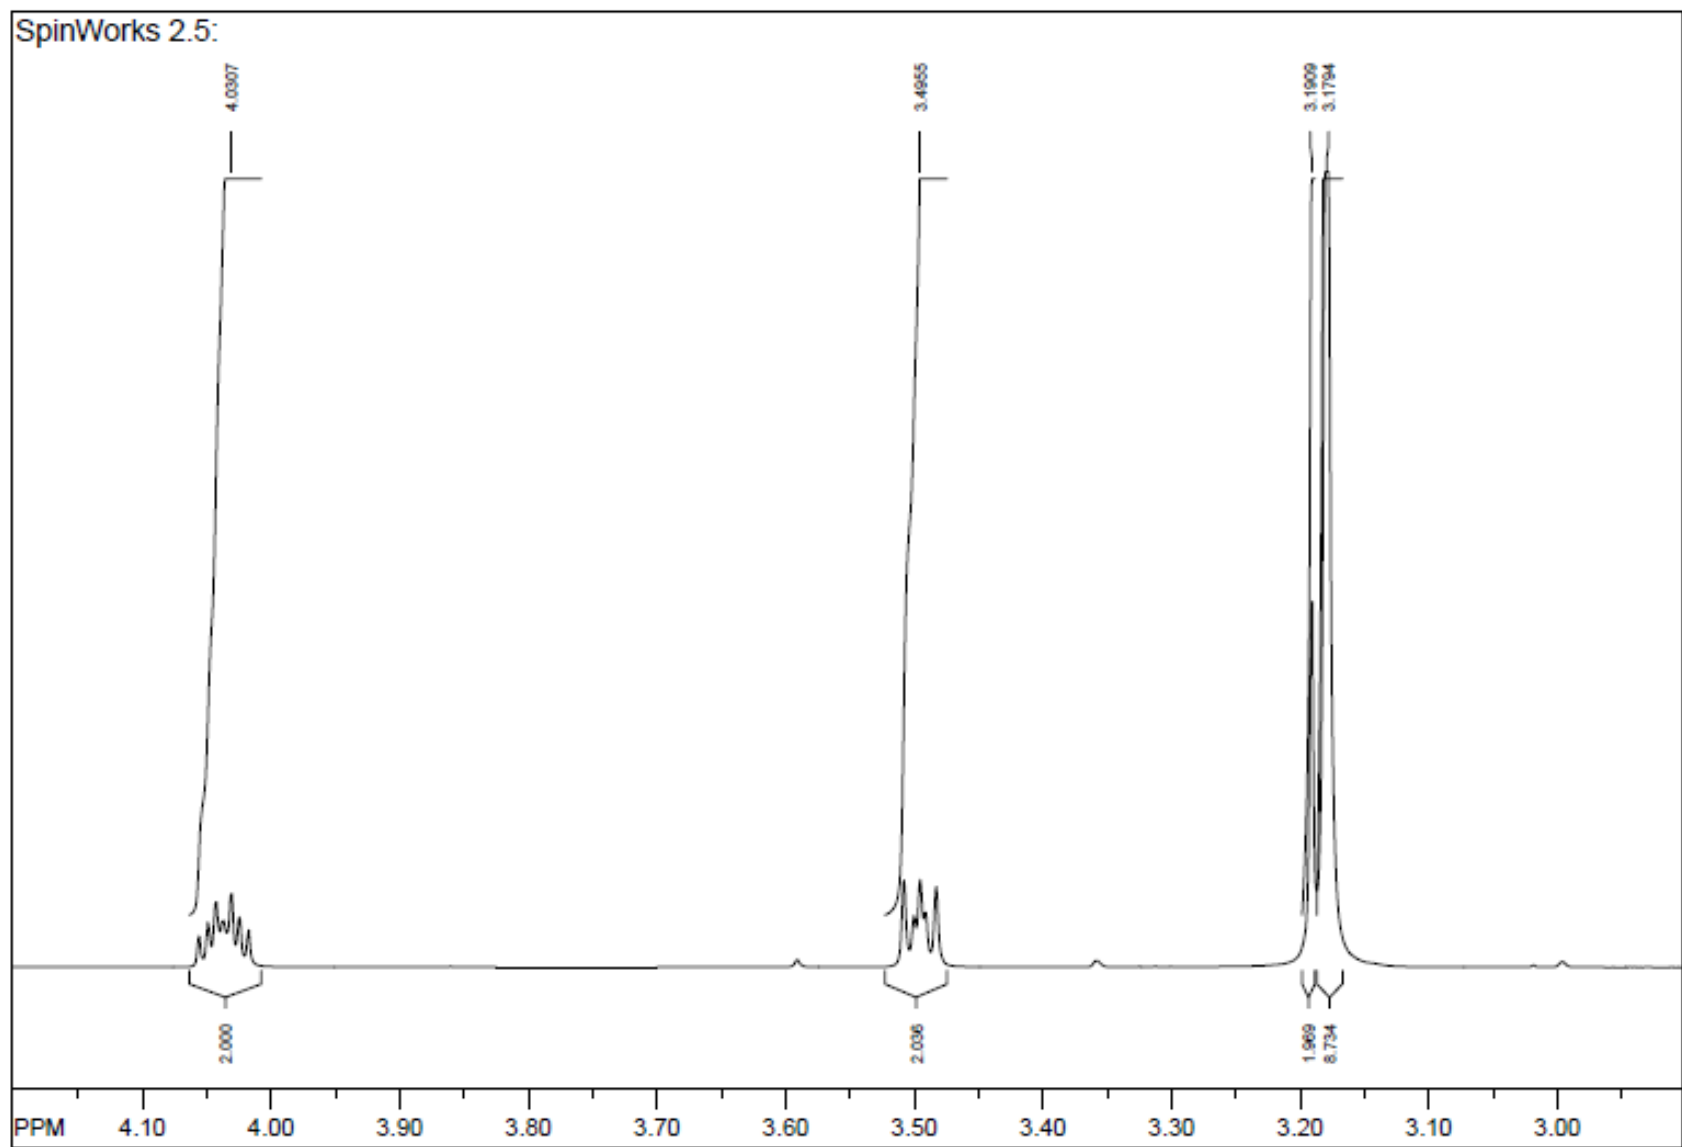

Fig. S1 <sup>1</sup>H NMR Spectrum of ChGly

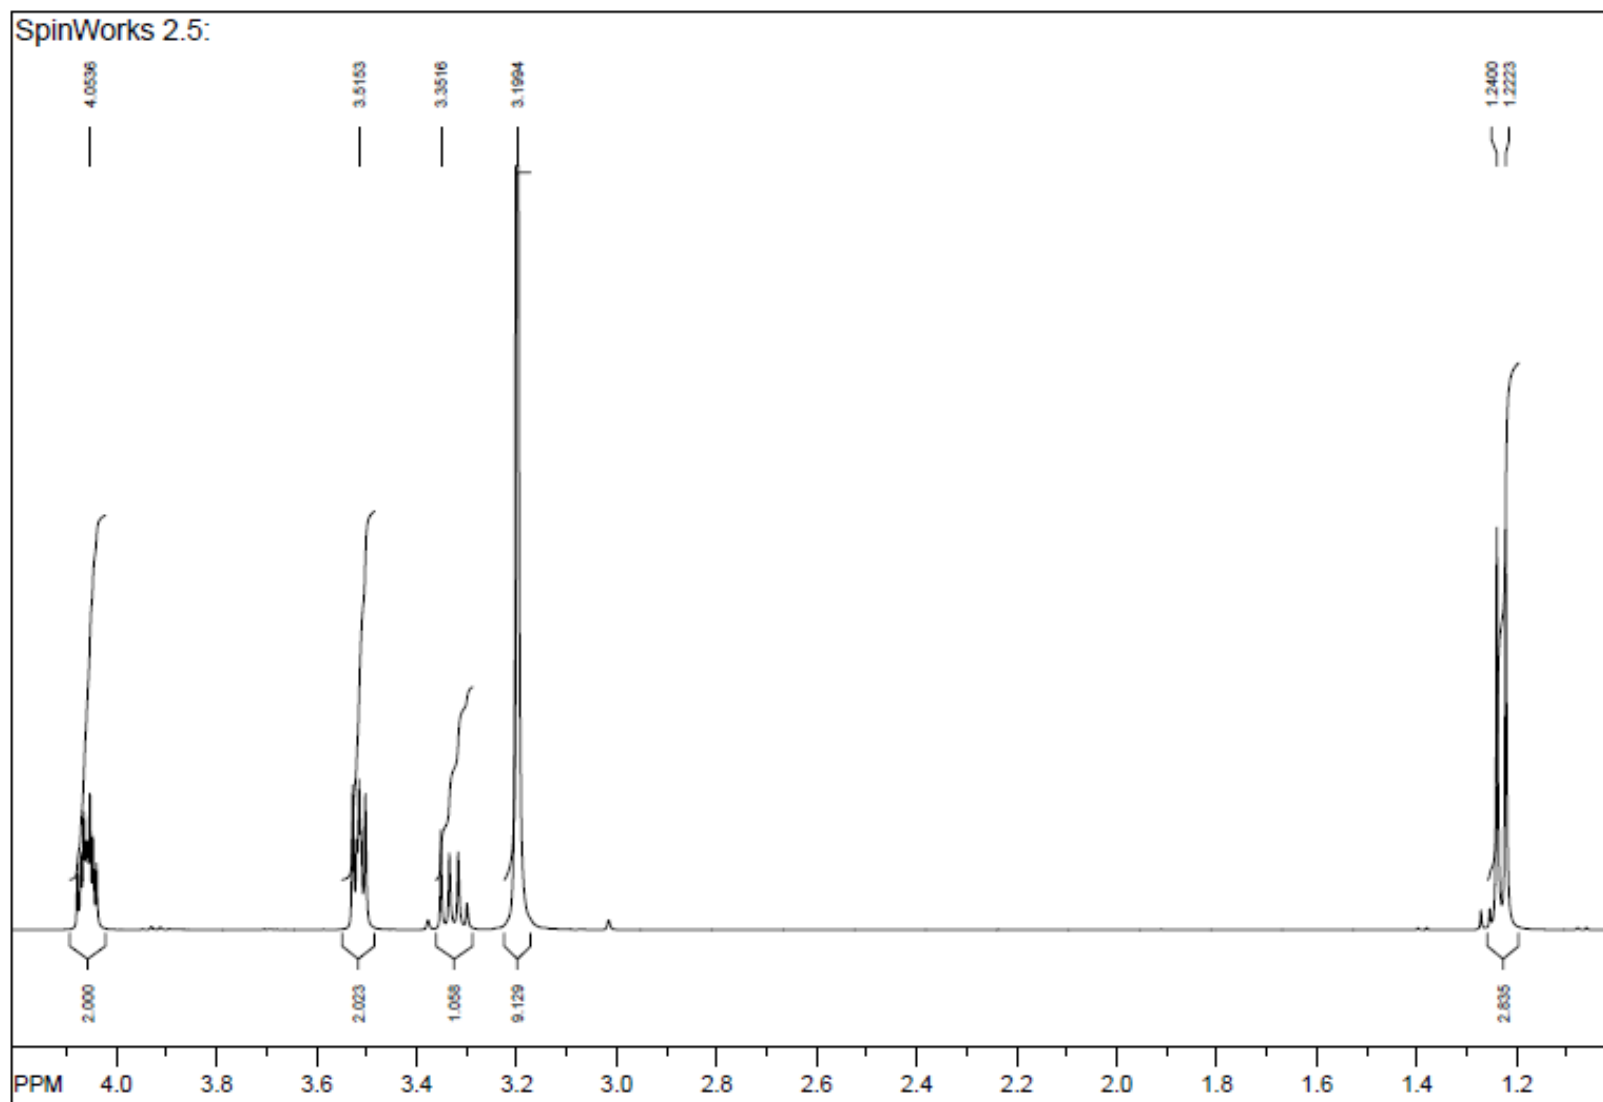

Fig. S2 <sup>1</sup>H NMR spectrum of ChAla

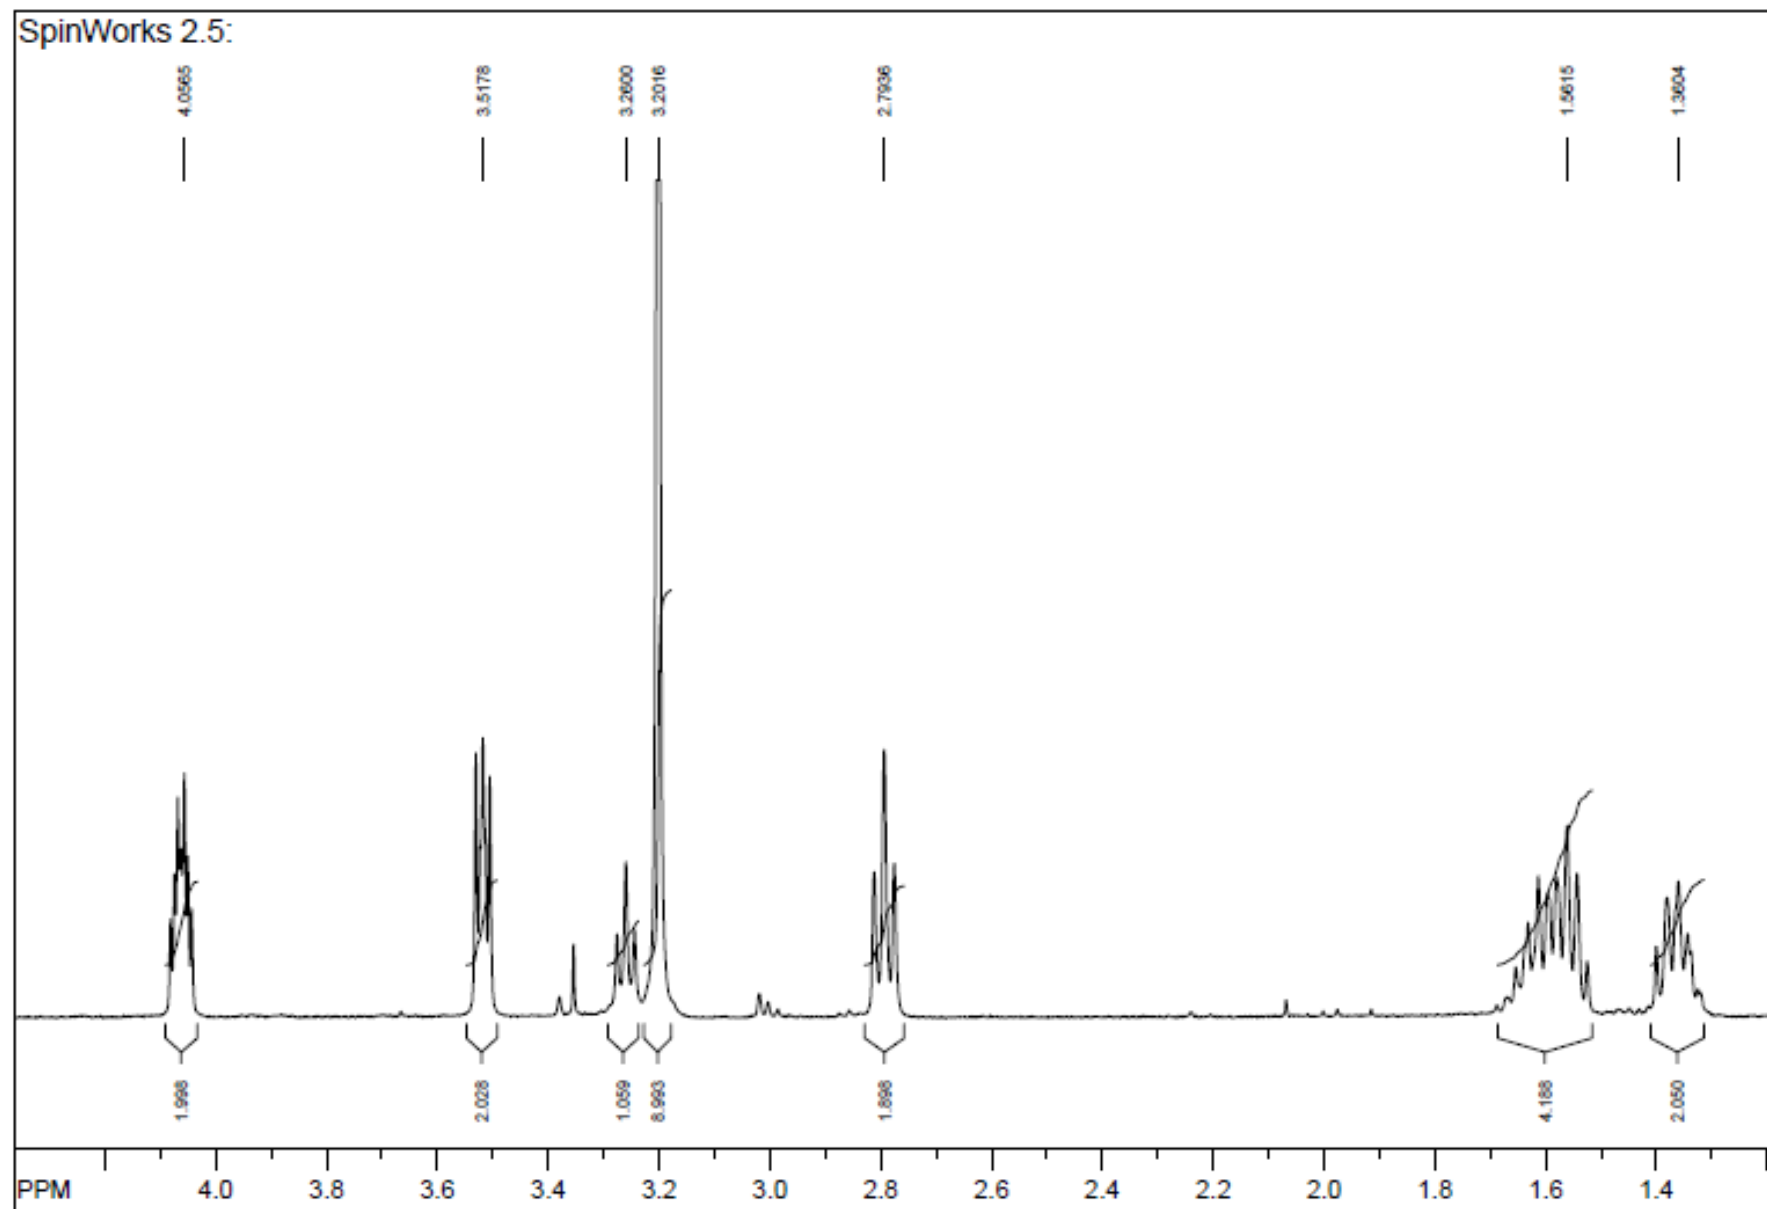

Fig. S3 <sup>1</sup>H NMR spectrum of ChLys

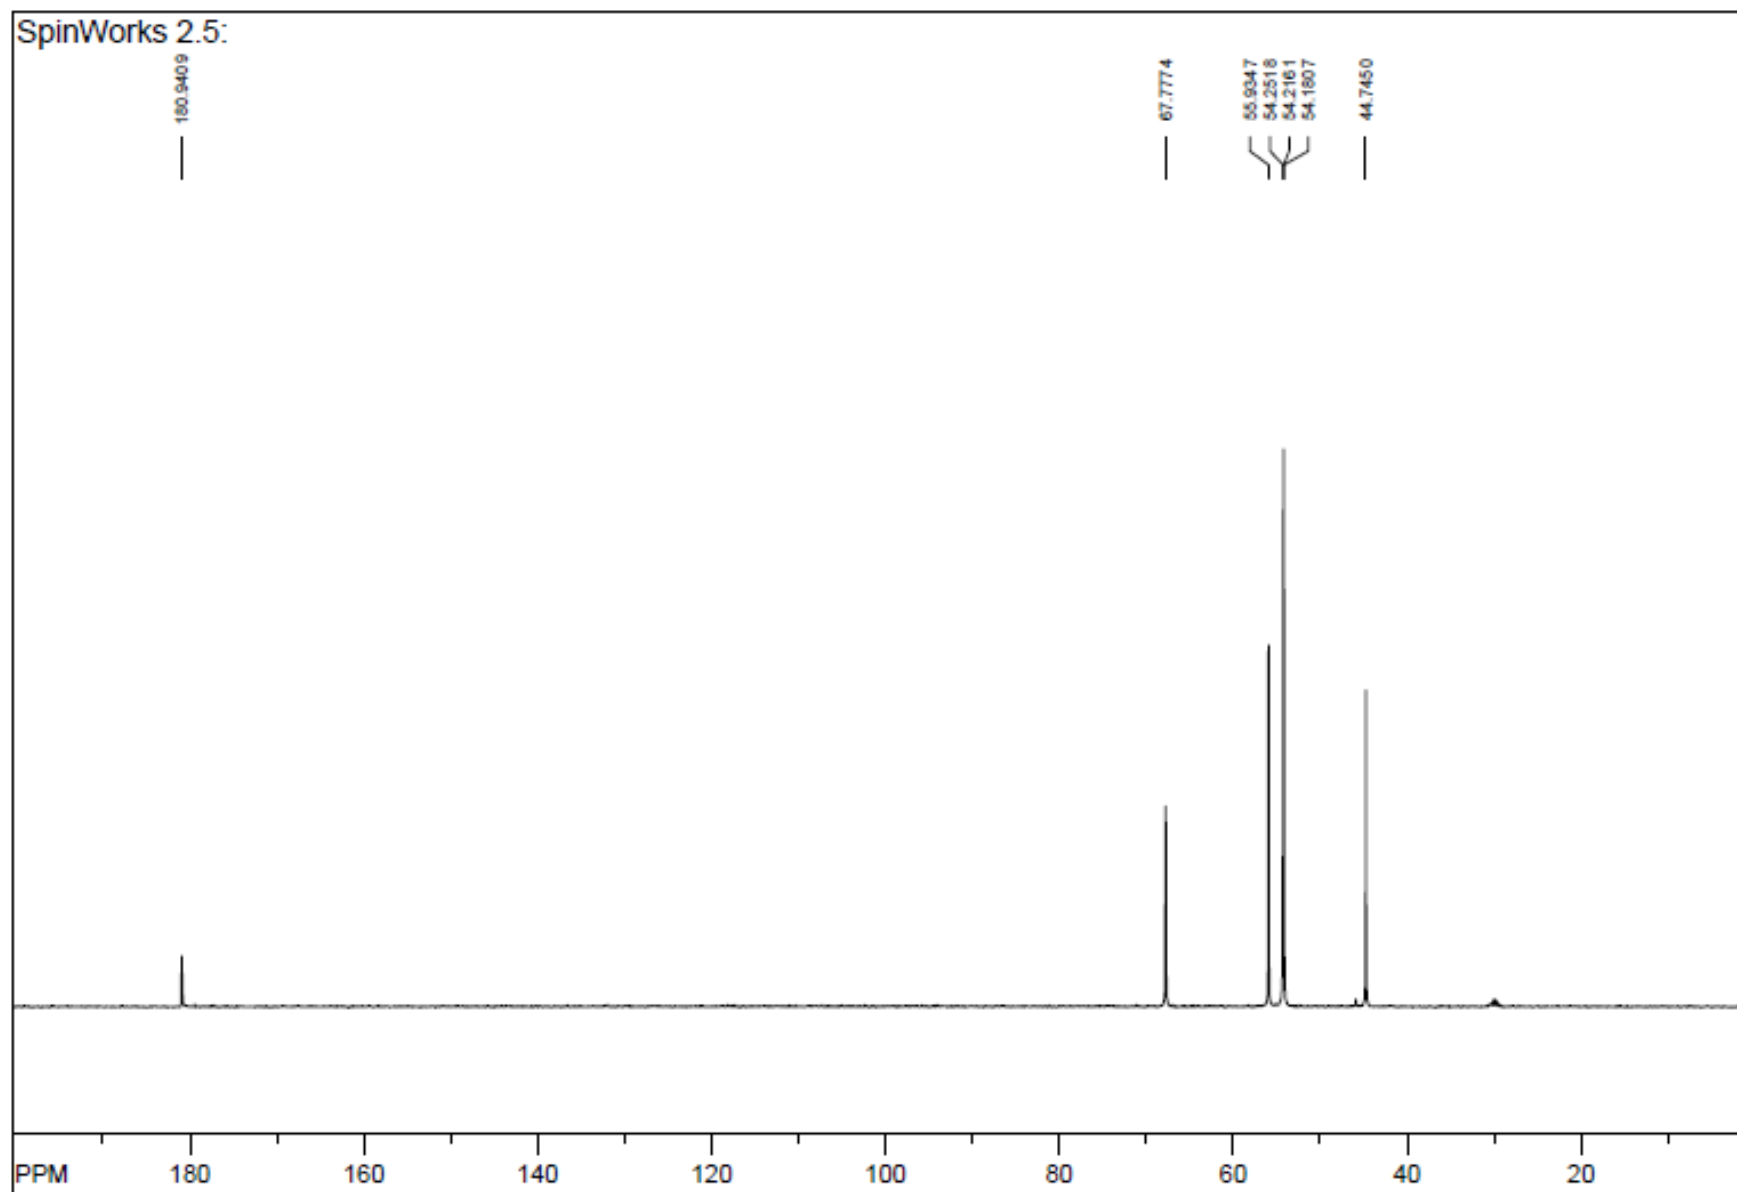

Fig. S4 <sup>13</sup>C NMR Spectrum of ChGly

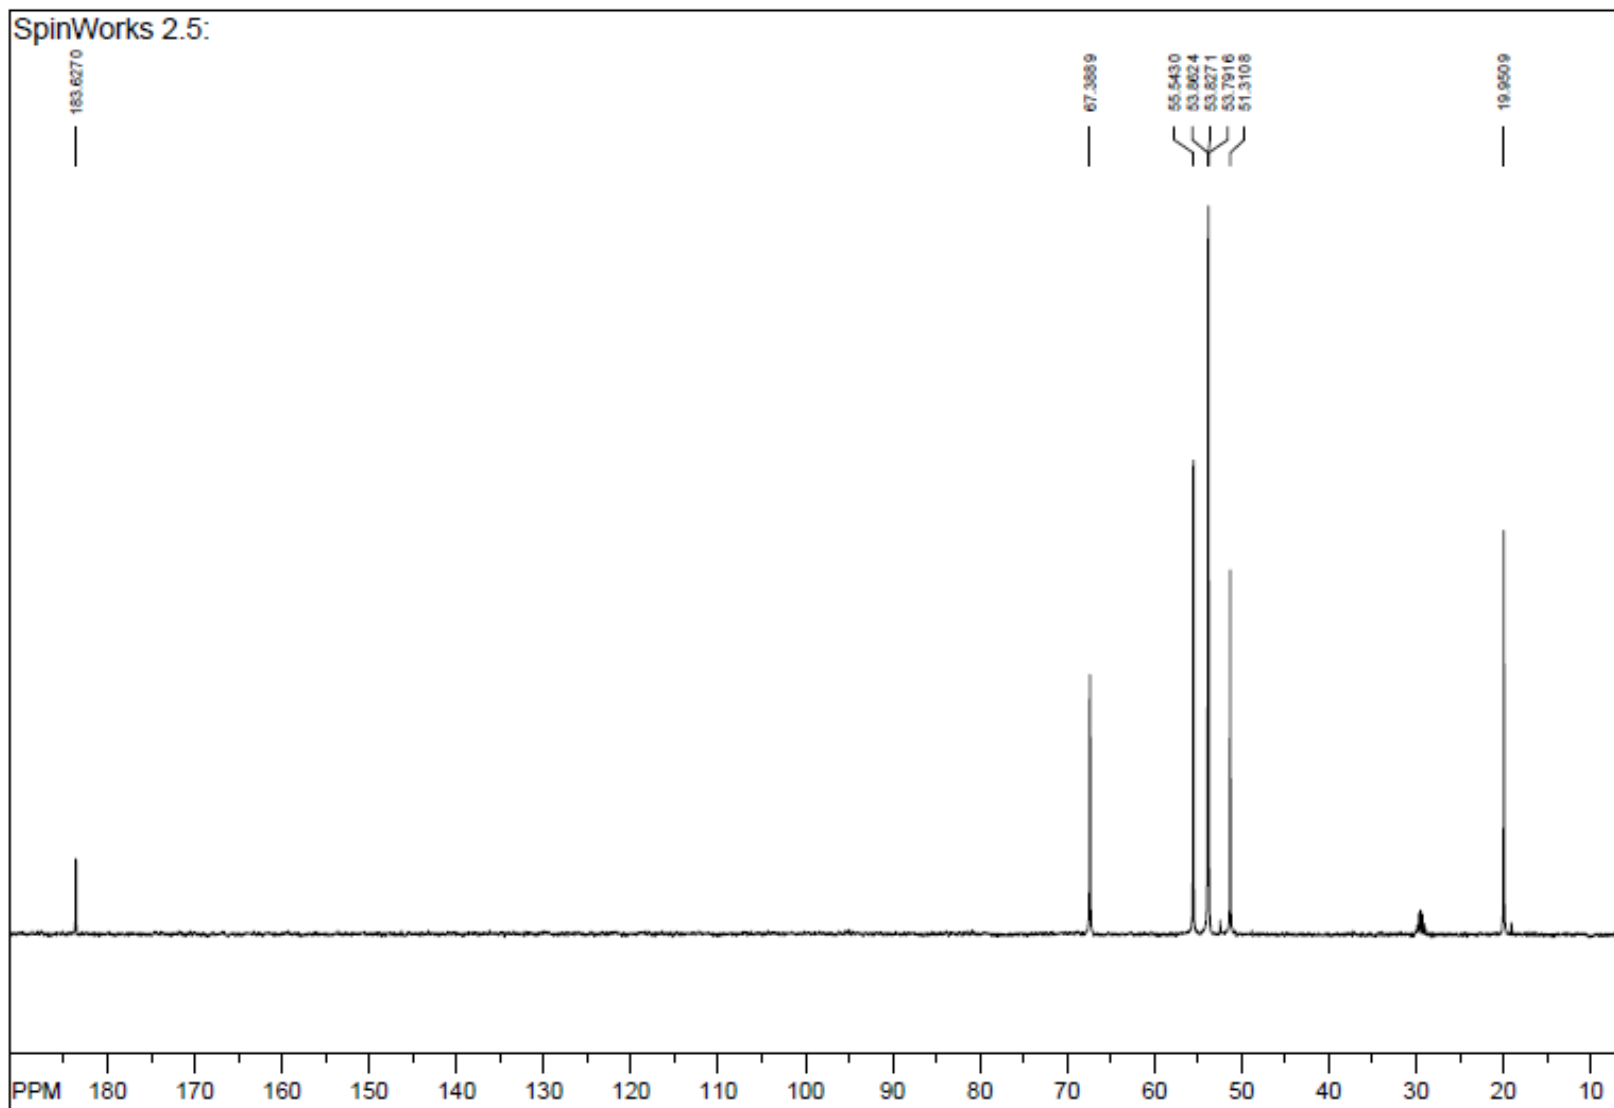

Fig. S5 <sup>13</sup>C NMR spectrum of ChAla

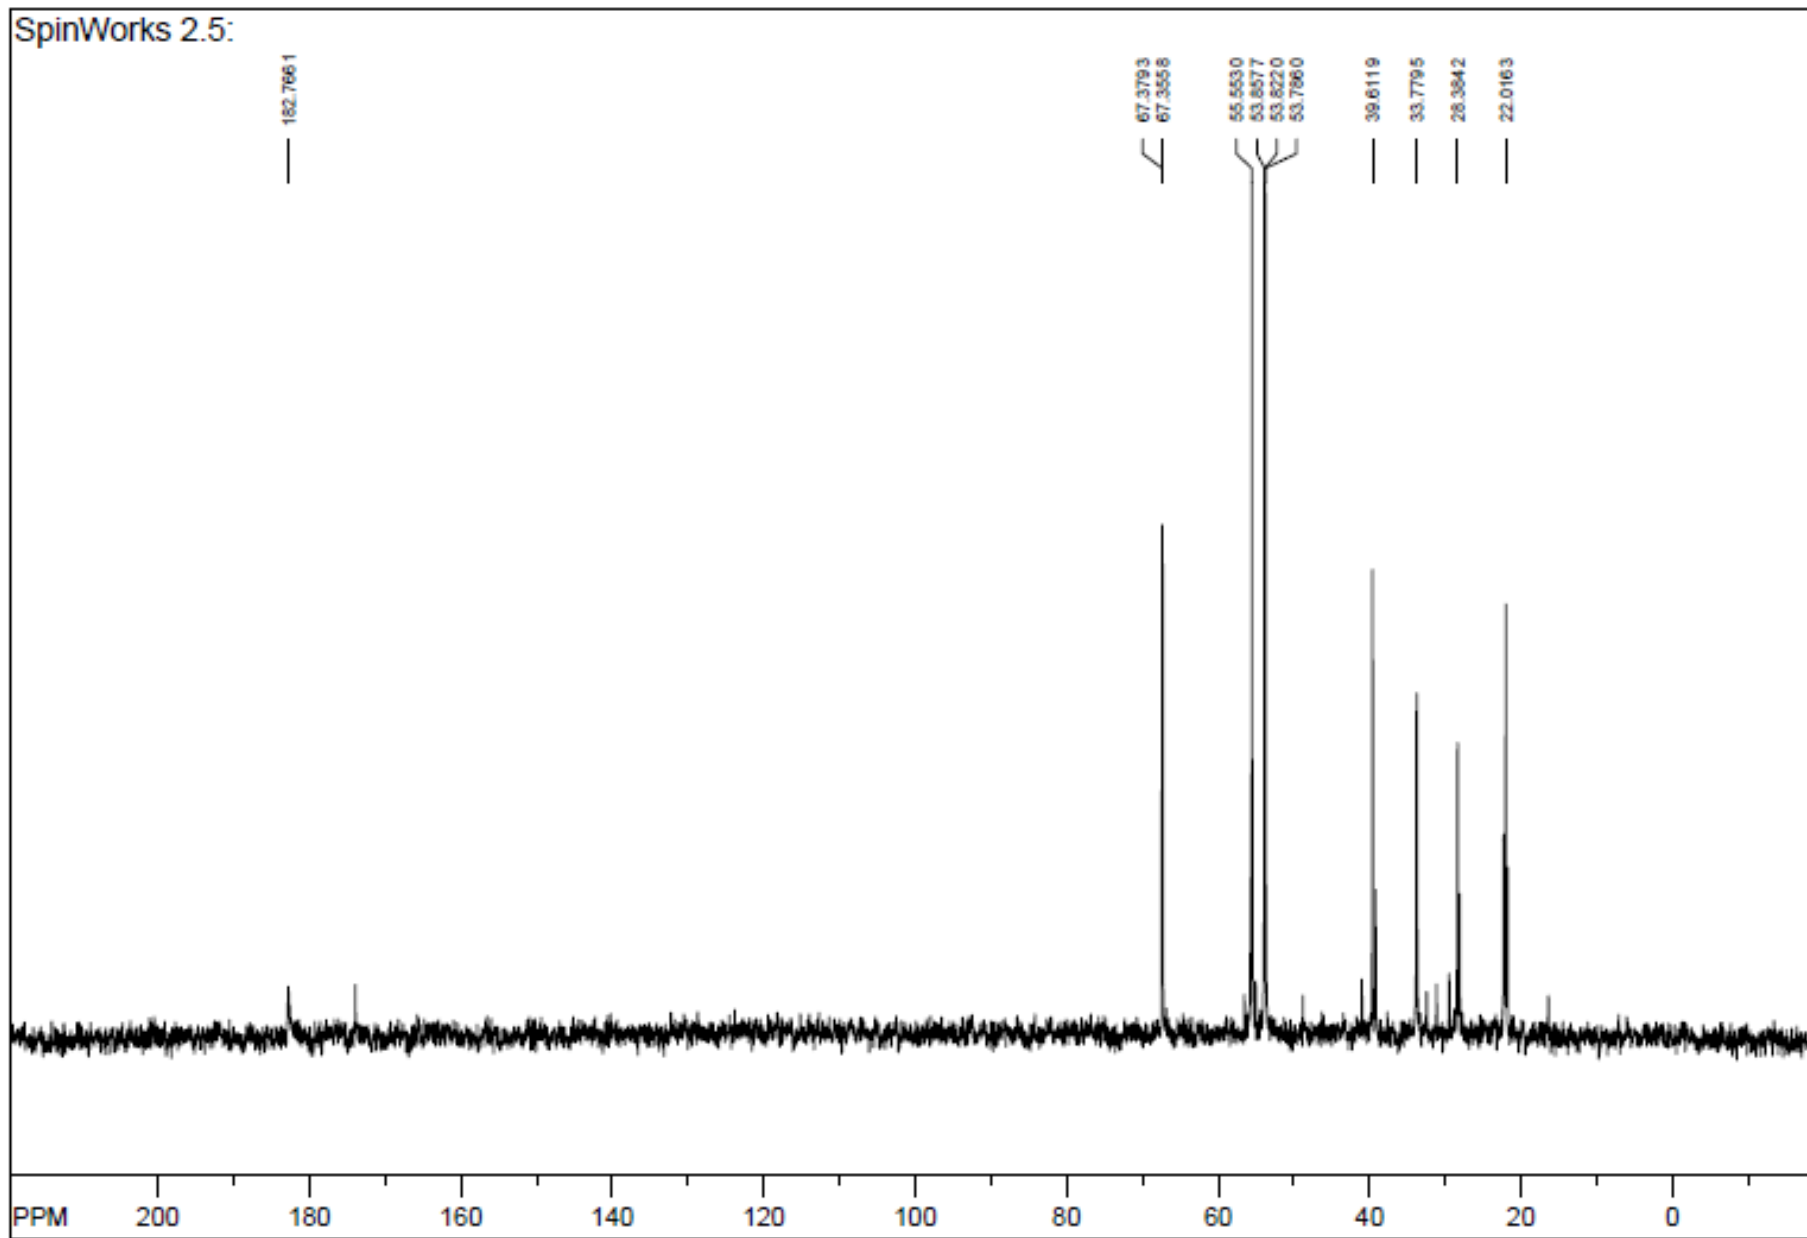

Fig. S6  $^{13}\text{C}$  NMR spectrum of ChLys

## ***Methods***

**Lipolytic activity** was determined spectrophotometrically using an aqueous solution of 2.5 mM of p-nitrophenyl laurate as substrate at pH 7.0, 25°C and 20 min reaction time (Sigugirladotir et al, 1993)[18] One of the products of the hydrolysis reaction, p-nitrophenol, was monitored by the increase in the absorbance band at 400 nm. One activity unit is defined as the amount of enzyme that produced 1  $\mu$ mol of p-nitrophenol per minute under standard assay conditions. The activities were expressed in (U/L) and all the results shown in the graphs are mean values of triplicates and the error bars are the standard deviation calculated from three independent measurements.

**Differential Scanning Calorimetry (DSC)** measurements were carried out in a MicroCal VP-DSC MicroCalorimeter controlled by the VP-viewer program and equipped with 0.51 mL cells. Studies were made using 0.473 mM of enzyme in the selected solvent (water or ionic liquid). Heating rates of 1 °C min<sup>-1</sup> were used from 40 to 90 °C. For each rate at least five blank measurements were performed with the respective reference solvent in both compartments. These runs were used as the baseline for the run with T1 lipolytic enzyme in the sample compartment and the corresponding solvent in the reference compartment. In all experiments solutions were degassed for 10 min under vacuum. An overpressure of about 30 psi was applied to the calorimeter cells. Calorimetric data were converted to heat capacity by subtracting the solvent baseline and dividing by the scan rate and protein concentration.

**Differential scanning fluorimetry (DSF)** data were obtained monitoring the fluorescence of the exogenous probe Sypro Orange, emission of which increases upon interaction with the hydrophobic moieties that become exposed upon protein unfolding induced by temperature rise. Using a real-time PCR instrument, it was possible to test a number of conditions in a 96-well plate in a single experiment.



**Table S1**  $T_m$  from DSC and DSF techniques at different concentrations (in molarity) of the selected cholinium-based ionic liquids.  $T_{m1}$  and  $T_{m2}$  are the first and the second structural transitions

| Concentration (M) | Solvent | DSC           |               |              | DSF        |       |                    | Std Dev | $\Delta T_m$ |       |
|-------------------|---------|---------------|---------------|--------------|------------|-------|--------------------|---------|--------------|-------|
|                   |         | $T_{m1}$ (°C) | $T_{m2}$ (°C) | $\Delta T_m$ | $T_m$ (°C) |       | $T_m$ average (°C) |         |              |       |
| 0.5 M             | Water   | 69.14         | 74.06         |              | 74.00      | 74.00 | 75.00              | 74.33   | 0.58         |       |
|                   | ChAla   |               | 62.24         | 11.82        | 63.00      | 62.00 | 62.00              | 62.33   | 0.58         | 12.00 |
|                   | ChGly   |               | 62.72         | 11.34        | 63.00      | 63.00 | 63.00              | 63.00   | 0.00         | 11.33 |
|                   | ChLys   |               | 65.09         | 8.97         | 65.00      | 65.00 | 64.00              | 64.67   | 0.58         | 9.67  |
|                   | ChCl    | 68.73         | 73.00         | 1.06         | 72.00      | 72.00 | 70.00              | 71.33   | 1.15         | 3.00  |
| 1 M               | ChAla   |               | 61.48         | 12.58        | 62.00      | 62.00 | 62.00              | 62.00   | 0.00         | 12.33 |
|                   | ChGly   |               | 61.54         | 12.52        | 63.00      | 62.00 | 62.00              | 62.33   | 0.58         | 12.00 |
|                   | ChLys   | 63.47         | 65.73         | 8.33         | 64.00      | 64.00 | 64.00              | 64.00   | 0.00         | 10.33 |
|                   | ChCl    | 67.97         | 71.85         | 2.21         | 70.00      | 69.00 | 69.00              | 69.33   | 0.58         | 5.00  |
| 2 M               | ChAla   |               | 60.86         | 13.20        | 61.00      | 61.00 | 60.00              | 60.67   | 0.58         | 13.67 |
|                   | ChGly   |               | 61.83         | 12.23        | 63.00      | 61.00 | 61.00              | 61.67   | 1.15         | 12.67 |
|                   | ChLys   |               | 65.35         | 8.71         | 64.00      | 64.00 | 63.00              | 63.67   | 0.58         | 10.67 |
|                   | ChCl    | 66.47         | 70.37         | 3.69         | 69.00      | 69.00 | 69.00              | 69.00   | 0.00         | 5.33  |

**Table S2** Water content, hydrophobicity, pH and activity of the ionic liquid-water mixtures under study

| Ionic liquid | Concentration (M) | % (v/v) | % water | logP (cation) | logP (anion) | logP   | pH   | % Activity |
|--------------|-------------------|---------|---------|---------------|--------------|--------|------|------------|
| ChAla        | 0.5               | 9.613   | 90.387  | -1.574        | -2.84        | -4.414 | 10.9 | 138.63     |
| ChGly        |                   | 8.912   | 91.088  | -1.574        | -3.41        | -4.984 | 10.9 | 173.13     |
| ChLys        |                   | 12.468  | 87.532  | -1.574        | -3.21        | -4.784 | 9.8  | 129.21     |
| ChCl         |                   | 6.981   | 93.019  | -1.574        | 0.61         | -0.964 | 5.3  | 90.41      |
| ChAla        | 1                 | 19.226  | 80.774  | -1.574        | -2.84        | -4.414 | 11   | 142.22     |
| ChGly        |                   | 17.824  | 82.176  | -1.574        | -3.41        | -4.984 | 11   | 159.42     |
| ChLys        |                   | 24.936  | 75.064  | -1.574        | -3.21        | -4.784 | 9.8  | 122.99     |
| ChCl         |                   | 13.962  | 86.038  | -1.574        | 0.61         | -0.964 | 5.5  | 97.25      |
| ChAla        | 2                 | 38.452  | 61.548  | -1.574        | -2.84        | -4.414 | 11.3 | 139.51     |
| ChGly        |                   | 35.648  | 64.352  | -1.574        | -3.41        | -4.984 | 11.1 | 138.18     |
| ChLys        |                   | 49.872  | 50.128  | -1.574        | -3.21        | -4.784 | 10.0 | 128.68     |
| ChCl         |                   | 27.924  | 72.076  | -1.574        | 0.61         | -0.964 | 4.7  | 56.72      |

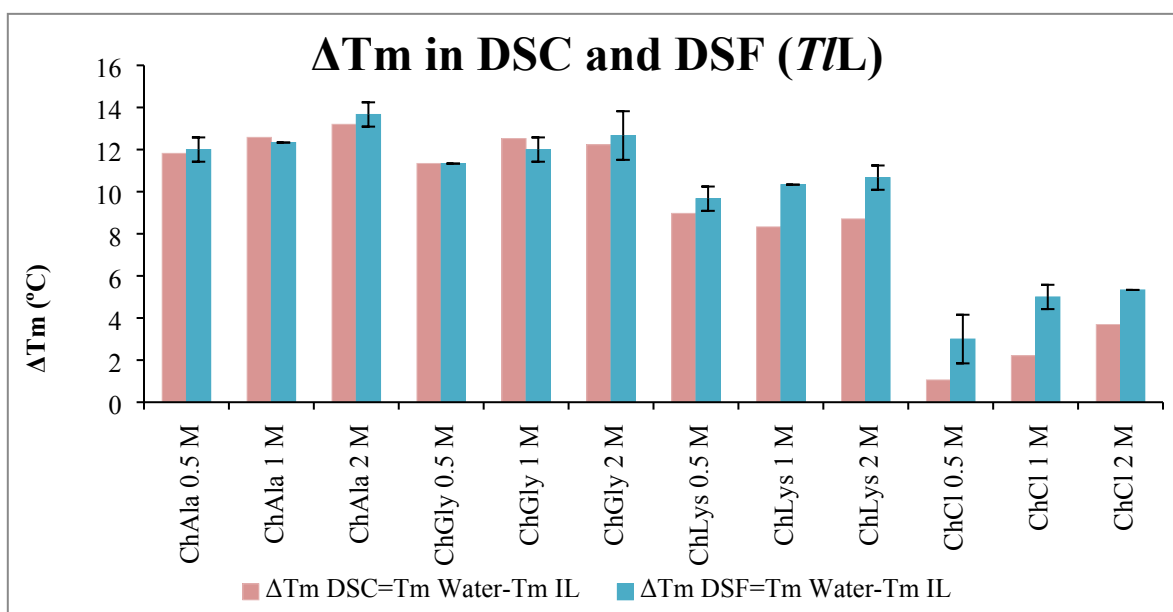

**Fig. S7** Effect of the selected cholinium amino acids and cholinium chloride on the structure of *TIL*

### References

- [S1] D. J. Tao, Z. Cheng, F. F. Chen, Z. M. Li, N. Hu, X. S. Chen, *J. Chem. Eng. Data* 2013, 58, 1542-1548.
- [S2] S. Sigurgísladóttir, M. Konráðsdóttir, A. Jónsson, J. K. Kristjánsson, E. Matthiasson, *Biotechnol. Lett.* 1993, 15, 361.
